# Supplementary material
Source: Springer Nature journal article supplement (https://www.springermedizin.de/resource/supplementary/12885_2010_2842_MOESM5_ESM.pdf/9461990)

| rank | batch | cmap name       |   | dose       | cell | score | up    | down  | Instance_id |
|------|-------|-----------------|---|------------|------|-------|-------|-------|-------------|
| 5176 | 676   | cyclopentiazide | 👤 | 11 $\mu$ M | MCF7 | 0     | -.156 | -.150 | 7325        |
| 5452 | 664   | cyclopentiazide | 👤 | 11 $\mu$ M | HL60 | 0     | -.245 | -.221 | 2905        |
| 5901 | 693   | cyclopentiazide | 👤 | 11 $\mu$ M | PC3  | -.675 | -.089 | .179  | 4229        |
| 6017 | 695   | cyclopentiazide | 👤 | 11 $\mu$ M | MCF7 | -.749 | -.106 | .191  | 4813        |

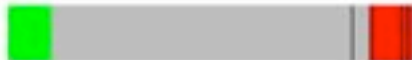

Supplement: MOESM5 [file 9461990]
